# Supplementary material for: Crossing Old Concepts: The Ecological Advantages of New Vineyard Types
Source: MDPI journal article supplement (doi:10.3390/d16010044), 2024-01-10
Supplement: s1 [file s1]

**Supplementary Table S1.** Taxa of wild bees (A) and butterflies (B) recorded in the sampled vineyards and their respective Red-List status according to the Red Lists of Rhineland-Palatinate (RL RLP<sup>1</sup>) and the Red Lists of Germany (RL GER<sup>2</sup>). Red List categories: 1 = threatened with extinction; 2 = strongly endangered; 3 = endangered; V = prewarning list; D = data deficient; G = endangerment of unknown extent; I = non-native breeding species; \* = least concern; ◇ = not evaluated; NA = Red List status not applicable to species groups<sup>3</sup>

| <b>Taxon</b>                                    | <b>RL RLP<sup>1</sup></b> | <b>RL GER<sup>2</sup></b> |
|-------------------------------------------------|---------------------------|---------------------------|
| <b>(A) wild bees</b>                            |                           |                           |
| <b>Andrenidae</b>                               |                           |                           |
| <i>Andrena agilissima</i> (SCOPOLI, 1770)       | 3                         | 3                         |
| <i>Andrena combinata</i> (CHRIST, 1791)         | 3                         | 3                         |
| <i>Andrena dorsata</i> (KIRBY, 1802)            | *                         | *                         |
| <i>Andrena flavipes</i> (PANZER, 1799)          | *                         | *                         |
| <i>Andrena fulvago</i> (CHRIST, 1791)           | *                         | 3                         |
| <i>Andrena gravaida</i> (IMHOFF, 1832)          | *                         | *                         |
| <i>Andrena haemorrhoa</i> (FABRICIUS, 1781)     | *                         | *                         |
| <i>Andrena hypopolia</i> (SCHMIEDEKNECHT, 1883) | ◇                         | 2                         |
| <i>Andrena labialis</i> (KIRBY, 1802)           | *                         | V                         |
| <i>Andrena labiata</i> (FABRICIUS, 1781)        | *                         | *                         |
| <i>Andrena minutula</i> (KIRBY, 1802)           | *                         | *                         |
| <i>Andrena nigroaenea</i> (KIRBY, 1802)         | *                         | *                         |
| <i>Andrena nitidiuscula</i> (SCHENCK, 1853)     | 3                         | 3                         |
| <i>Andrena ovatula</i> agg.                     | NA                        | NA                        |
| <i>Andrena scotica</i> (PERKINS, 1916)          | *                         | *                         |
| <i>Andrena subopaca</i> (NYLANDER, 1848)        | *                         | *                         |
| <i>Andrena wilkella</i> (KIRBY, 1802)           | *                         | *                         |
| <i>Panurgus dentipes</i> (LATREILLE, 1811)      | 3                         | 3                         |
| <b>Anthophoridae</b>                            |                           |                           |
| <i>Anthophora aestivalis</i> (PANZER, 1801)     | *                         | 3                         |
| <i>Ceratina chalybea</i> (CHEVRIER, 1872)       | 3                         | 3                         |
| <i>Ceratina cucurbitina</i> (ROSSI, 1792)       | *                         | *                         |
| <i>Ceratina cyanea</i> (KIRBY, 1802)            | *                         | *                         |
| <i>Epeolus variegatus</i> (LINNAEUS, 1758)      | *                         | V                         |
| <i>Eucera longicornis</i> (LINNAEUS, 1758)      | *                         | V                         |
| <i>Eucera nigrescens</i> (PÉREZ, 1879)          | *                         | *                         |
| <i>Nomada flava</i> (PANZER, 1798)              | *                         | *                         |
| <i>Nomada fucata</i> (PANZER, 1798)             | *                         | *                         |
| <i>Nomada fulvicornis</i> (FABRICIUS, 1793)     | *                         | *                         |
| <i>Nomada lathburiana</i> (KIRBY, 1802)         | *                         | *                         |
| <i>Nomada succincta</i> (PANZER, 1798)          | *                         | *                         |
| <i>Xylocopa violacea</i> (LINNAEUS, 1758)       | 3                         | *                         |
| <b>Apidae</b>                                   |                           |                           |
| <i>Bombus bohemicus</i> (SEIDL, 1838)           | *                         | *                         |
| <i>Bombus hortorum</i> agg.                     | NA                        | NA                        |

| <b>Taxon</b>                                        | <b>RL RLP<sup>1</sup></b> | <b>RL GER<sup>2</sup></b> |
|-----------------------------------------------------|---------------------------|---------------------------|
| <i>Bombus humilis</i> (ILLIGER, 1806)               | 3                         | 3                         |
| <i>Bombus hypnorum</i> (LINNAEUS, 1758)             | *                         | *                         |
| <i>Bombus lapidarius</i> (LINNAEUS, 1758)           | *                         | *                         |
| <i>Bombus pascuorum</i> (SCOPOLI, 1763)             | *                         | *                         |
| <i>Bombus pratorum</i> (LINNAEUS, 1761)             | *                         | *                         |
| <i>Bombus ruderalis</i> (MÜLLER, 1776)              | 3                         | 3                         |
| <i>Bombus rupestris</i> (FABRICIUS, 1793)           | *                         | *                         |
| <i>Bombus soroeensis</i> (FABRICIUS, 1776)          | *                         | V                         |
| <i>Bombus terrestris</i> agg.                       | NA                        | NA                        |
| <i>Bombus veteranus</i> (FABRICIUS, 1793)           | 3                         | 3                         |
| <b>Colletidae</b>                                   |                           |                           |
| <i>Colletes cunicularius</i> (LINNAEUS, 1761)       | *                         | *                         |
| <i>Colletes daviesanus</i> (SMITH, 1846)            | *                         | *                         |
| <i>Colletes hederæ</i> (SCHMIDT & WESTRICH, 1993)   | 2                         | *                         |
| <i>Colletes similis</i> (SCHENCK, 1853)             | *                         | V                         |
| <i>Hylaeus angustatus</i> (SCHENCK, 1861)           | *                         | *                         |
| <i>Hylaeus brevicornis</i> (NYLANDER, 1852)         | *                         | *                         |
| <i>Hylaeus clypearis</i> (SCHENCK, 1853)            | *                         | *                         |
| <i>Hylaeus confusus</i> (NYLANDER, 1852)            | *                         | *                         |
| <i>Hylaeus cornutus</i> (CURTIS, 1831)              | *                         | *                         |
| <i>Hylaeus difformis</i> (EVERSMANN, 1852)          | *                         | *                         |
| <i>Hylaeus dilatatus</i> (KIRBY, 1802)              | *                         | *                         |
| <i>Hylaeus duckei</i> (ALFKEN, 1904)                | 2                         | 3                         |
| <i>Hylaeus gredleri</i> (FÖRSTER, 1871)             | *                         | *                         |
| <i>Hylaeus nigritus</i> (FABRICIUS, 1798)           | *                         | *                         |
| <i>Hylaeus paulus</i> (BRIDWELL, 1919)              | ◇                         | *                         |
| <i>Hylaeus styriacus</i> (FÖRSTER, 1871)            | *                         | *                         |
| <b>Halictidae</b>                                   |                           |                           |
| <i>Halictus maculatus</i> (SMITH, 1848)             | *                         | *                         |
| <i>Halictus scabiosae</i> (ROSSI, 1790)             | *                         | *                         |
| <i>Halictus simplex</i> agg.                        | NA                        | *                         |
| <i>Halictus subauratus</i> (ROSSI, 1792)            | *                         | *                         |
| <i>Halictus tumulorum</i> (LINNAEUS, 1758)          | *                         | *                         |
| <i>Lasioglossum calceatum</i> (SCOPOLI, 1763)       | *                         | *                         |
| <i>Lasioglossum costulatum</i> (KRIECHBAUMER, 1873) | 3                         | 3                         |
| <i>Lasioglossum laticeps</i> (SCHENCK, 1868)        | *                         | *                         |
| <i>Lasioglossum lativentris</i> (SCHENCK, 1853)     | *                         | V                         |
| <i>Lasioglossum leucozonium</i> (SCHRANK, 1781)     | *                         | *                         |
| <i>Lasioglossum malachurum</i> (KIRBY, 1802)        | *                         | *                         |
| <i>Lasioglossum minutulum</i> (SCHENCK, 1853)       | *                         | 3                         |
| <i>Lasioglossum morio</i> (FABRICIUS, 1793)         | *                         | *                         |
| <i>Lasioglossum nitidiusculum</i> (KIRBY, 1802)     | 3                         | V                         |

| <b>Taxon</b>                                       | <b>RL RLP<sup>1</sup></b> | <b>RL GER<sup>2</sup></b> |
|----------------------------------------------------|---------------------------|---------------------------|
| <i>Lasioglossum parvulum</i> (SCHENCK, 1853)       | *                         | V                         |
| <i>Lasioglossum pauperatum</i> (BRULLÉ, 1832)      | 2                         | 2                         |
| <i>Lasioglossum pauxillum</i> (SCHENCK, 1853)      | *                         | *                         |
| <i>Lasioglossum politum</i> (SCHENCK, 1853)        | *                         | *                         |
| <i>Lasioglossum punctatissimum</i> (SCHENCK, 1853) | *                         | *                         |
| <i>Lasioglossum pygmaeum</i> (SCHENCK, 1853)       | 3                         | G                         |
| <i>Lasioglossum smeathmanellum</i> agg.            | *                         | *                         |
| <i>Lasioglossum tricinctum</i> (SCHENCK, 1874)     | 3                         | 3                         |
| <i>Lasioglossum villosulum</i> (KIRBY, 1802)       | *                         | *                         |
| <i>Sphecodes albilabris</i> (FABRICIUS, 1793)      | *                         | *                         |
| <i>Sphecodes ephippius</i> (LINNAEUS, 1767)        | *                         | *                         |
| <i>Sphecodes gibbus</i> (LINNAEUS, 1758)           | *                         | *                         |
| <i>Sphecodes hyalinatus</i> (VON HAGENS, 1882)     | *                         | *                         |
| <i>Sphecodes monilicornis</i> (KIRBY, 1802)        | *                         | *                         |
| <i>Sphecodes reticulatus</i> (THOMSON, 1870)       | *                         | *                         |
| <i>Sphecodes rubicundus</i> (VON HAGENS, 1875)     | 3                         | 3                         |
| <i>Sphecodes rufiventris</i> (PANZER, 1798)        | 3                         | *                         |
| <b>Megachilidae</b>                                |                           |                           |
| <i>Anthidium manicatum</i> (LINNAEUS, 1758)        | *                         | *                         |
| <i>Anthidium punctatum</i> (LATREILLE, 1809)       | *                         | V                         |
| <i>Coelioxys afra</i> (LEPELETIER, 1841)           | 3                         | 3                         |
| <i>Coelioxys inermis</i> (KIRBY, 1802)             | 3                         | *                         |
| <i>Coelioxys mandibularis</i> (NYLANDER, 1848)     | *                         | *                         |
| <i>Megachile centuncularis</i> (LINNAEUS, 1758)    | *                         | V                         |
| <i>Megachile lagopoda</i> (LINNAEUS, 1761)         | 2                         | 2                         |
| <i>Megachile pilidens</i> (ALFKEN, 1924)           | 3                         | 3                         |
| <i>Megachile versicolor</i> (SMITH, 1844)          | *                         | *                         |
| <i>Osmia adunca</i> (PANZER, 1798)                 | *                         | *                         |
| <i>Osmia aurulenta</i> (PANZER, 1799)              | *                         | *                         |
| <i>Osmia bicornis</i> (LINNAEUS, 1758)             | *                         | *                         |
| <i>Osmia brevicornis</i> (FABRICIUS, 1798)         | 3                         | G                         |
| <i>Osmia caerulea</i> (LINNAEUS, 1758)             | *                         | *                         |
| <i>Osmia campanularum</i> (KIRBY, 1802)            | *                         | *                         |
| <i>Osmia claviventris</i> (THOMSON, 1872)          | *                         | *                         |
| <i>Osmia gallarum</i> (SPINOLA, 1808)              | 3                         | V                         |
| <i>Osmia leucomelana</i> (KIRBY, 1802)             | *                         | *                         |
| <i>Osmia tridentata</i> (DUFOUR & PERRIS, 1840)    | *                         | 3                         |
| <i>Osmia truncorum</i> (LINNAEUS, 1758)            | *                         | *                         |
| <b>(B) butterflies</b>                             |                           |                           |
| <b>Hesperiidae</b>                                 |                           |                           |
| <i>Carcharodus alceae</i> (ESPER, 1780)            | 3                         | *                         |
| <i>Pyrgus malvae</i> (LINNAEUS, 1758)              | V                         | V                         |

| <b>Taxon</b>                                          | <b>RL RLP<sup>1</sup></b> | <b>RL GER<sup>2</sup></b> |
|-------------------------------------------------------|---------------------------|---------------------------|
| <i>Thymelicus sylvestris</i> (PODA, 1761)             | *                         | *                         |
| <b>Papilionidae</b>                                   |                           |                           |
| <i>Ipheclides podalirius</i> (LINNAEUS, 1758)         | 1                         | 3                         |
| <i>Papilio machaon</i> (LINNAEUS, 1758)               | V                         | *                         |
| <b>Pieridae</b>                                       |                           |                           |
| <i>Anthocharis cardamines</i> (LINNAEUS, 1758)        | *                         | *                         |
| <i>Aporia crataegi</i> (LINNAEUS, 1758)               | V                         | *                         |
| <i>Colias croceus</i> (FOURCROY, 1785)                | I                         | *                         |
| <i>Gonepteryx rhamni</i> (LINNAEUS, 1758)             | *                         | *                         |
| <i>Leptidea sinapis/reali</i> (LINNAEUS, 1758)        | V                         | D                         |
| <i>Pieris brassicae</i> (LINNAEUS, 1758)              | *                         | *                         |
| <i>Pieris mannii</i> (MAYER, 1851)                    | D                         | ◇                         |
| <i>Pieris napi</i> (LINNAEUS, 1758)                   | *                         | *                         |
| <i>Pieris rapae</i> (LINNAEUS, 1758)                  | *                         | *                         |
| <b>Lycaenidae</b>                                     |                           |                           |
| <i>Lycaena phlaeas</i> (LINNAEUS, 1761)               | *                         | *                         |
| <i>Lycaena tityrus</i> (PODA, 1761)                   | V                         | *                         |
| <i>Polyommatus icarus</i> (ROTTEMBURG, 1775)          | *                         | *                         |
| <i>Satyrrium acaciae</i> (FABRICIUS, 1787)            | 2                         | V                         |
| <i>Satyrrium spini</i> (DENIS & SCHIFFERMÜLLER, 1775) | 2                         | 3                         |
| <b>Nymphalidae*</b>                                   |                           |                           |
| <i>Aglais io</i> (LINNAEUS, 1758)                     | *                         | *                         |
| <i>Aglais urticae</i> (LINNAEUS, 1758)                | *                         | *                         |
| <i>Issoria lathonia</i> (LINNAEUS, 1758)              | V                         | *                         |
| <i>Melitaea didyma</i> (ESPER, 1779)                  | 2                         | 2                         |
| <i>Nymphalis polychloros</i> (LINNAEUS, 1758)         | 3                         | V                         |
| <i>Polygonia c-album</i> (LINNAEUS, 1758)             | *                         | *                         |
| <i>Vanessa atalanta</i> (LINNAEUS, 1758)              | *                         | *                         |
| <b>Satyridae</b>                                      |                           |                           |
| <i>Coenonympha pamphilus</i> (LINNAEUS, 1758)         | *                         | *                         |
| <i>Lasiommata megera</i> (LINNAEUS, 1767)             | *                         | *                         |
| <i>Maniola jurtina</i> (LINNAEUS, 1758)               | *                         | *                         |
| <i>Melanargia galathea</i> (LINNAEUS, 1758)           | *                         | *                         |
| <i>Pyronia tithonus</i> (LINNAEUS, 1771)              | V                         | *                         |

<sup>1</sup>Bees: Schmid-Egger et al. (1995), butterflies: Schmidt (2013); <sup>2</sup>bees: Westrich et al. (2011), butterflies: Reinhardt & Bolz (2011); <sup>3</sup>sixteen species belonging to five closely related species groups, difficult to distinguish morphologically (e.g. no clear morphological differences in females), were pooled similarly to Krahner et al. (2021): *Andrena ovatula* agg., comprising *Andrena ovatula*, *A. wilkella*, *A. intermedia*, *A. similis* and *A. gelgiae*; *Bombus terrestris* agg., comprising *Bombus cryptarum*, *B. lucorum*, *B. magnus* and *B. terrestris*;

*Bombus hortorum* agg., comprising *Bombus hortorum* and *B. ruderatus*; *Lasioglossum smeathmanellum* agg., comprising *Lasioglossum nitidulum* and *L. smeathmanellum*; *Halictus simplex* agg., comprising *Halictus eurygnathus*, *H. langobardicus* and *H. simplex*.

**Supplementary Table S2.** Detected species and individuals of wild bees: (A) total data set and (B) data set reduced for taking spatial autocorrelation into account.

| family                  | species    | species [%]  | individuals | individuals [%] |
|-------------------------|------------|--------------|-------------|-----------------|
| <b>(A) total data</b>   |            |              |             |                 |
| Andrenidae              | 18         | 16.4         | 137         | 13.5            |
| Anthophoridae           | 13         | 11.8         | 97          | 9.6             |
| Apidae                  | 12         | 10.9         | 209         | 20.6            |
| Colletidae              | 16         | 14.5         | 130         | 12.8            |
| Halictidae              | 31         | 28.2         | 369         | 36.4            |
| Megachilidae            | 20         | 18.2         | 71          | 7.0             |
| <b>total</b>            | <b>110</b> | <b>100.0</b> | <b>1013</b> | <b>100.0</b>    |
| <b>(B) reduced data</b> |            |              |             |                 |
| Andrenidae              | 14         | 15.9         | 72          | 12.7            |
| Anthophoridae           | 9          | 10.2         | 55          | 9.7             |
| Apidae                  | 10         | 11.4         | 119         | 21.0            |
| Colletidae              | 14         | 15.9         | 83          | 14.6            |
| Halictidae              | 27         | 30.7         | 195         | 34.3            |
| Megachilidae            | 14         | 15.9         | 44          | 7.7             |
| <b>total</b>            | <b>88</b>  | <b>100.0</b> | <b>568</b>  | <b>100.0</b>    |

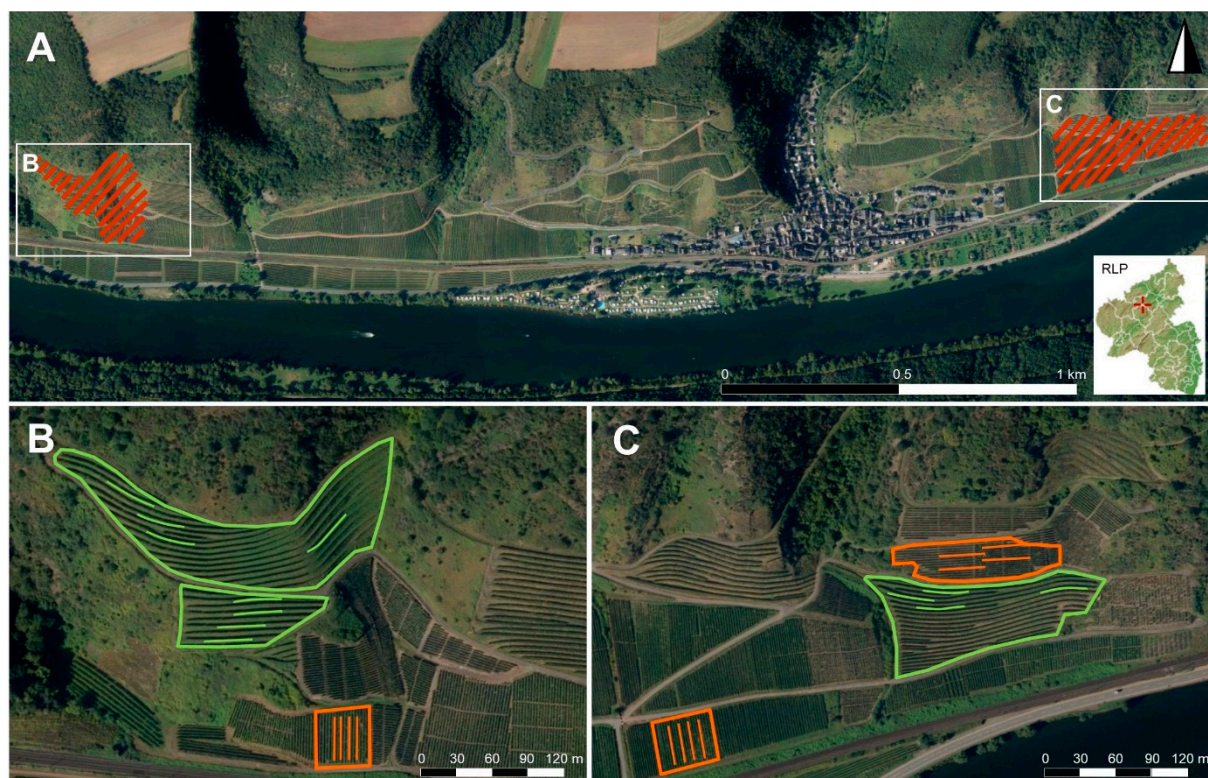

**Supplementary Figure S1.** Map of the study area . **A:** Location of the investigated vineyards (red shaded areas) around Pommern (Rhineland-Palatinate, southwestern Germany). **B-C:** Location of the 24 line transects west (**B**) and east (**C**) of Pommern. Two differently managed vineyard types were studied: vineyards with greened embankments (GEV, green) and vineyards without such embankments (NEV, brown). Source of aerial photographs and geodata: LVerGeo (2022). The study area consists mainly of Cambisols and (Lithic) Leptosols (MU & LUG, 1993). Climatically it is imbedded within the Rhenish Slate Mountains (Hembach & Cölln, 1996; MU & LUG, 1993). Average annual temperatures (at 2 m height) were 10.2 – 11.8 °C, total annual precipitation 635 – 782 mm, and total annual hours of sunshine 1580 – 1736 h (weather station Pommern, DLR RNH 2022).

## References:

- DLR RNH/ Dienstleistungszentrum Ländlicher Raum Rheinhessen-Nahe-Hunsrück. Wetterstation Pommern. <https://www.dlr.rlp.de/Internet/AM/NotesAM.nsf/cc619a07ed6c4634c1257800003dca56/3950a722536f8906c1257171002e8a7e?OpenDocument&TableRow=2.1.1,2.7#2.1>. (2022).
- Hembach, J., & Cölln, K. Beitrag zur Kenntnis der Wildbienenfauna des Moseltales (Hymenoptera: Apidae). *Dendrocopos* **23**, 174–179. (1996).
- Krahner, A., Schmidt, J., Maixner, M., Porten, M., & Schmitt, T. Evaluation of four different methods for assessing bee diversity as ecological indicators of agro-ecosystems. *Ecol. Indic.* **125**, 107573 <https://doi.org/10.1016/j.ecolind.2021.107573> (2021).
- LVerGeo/ Landesamt für Vermessung und Geobasisinformation Rheinland-Pfalz. LANIS – Geoportal der Naturschutzverwaltung Rheinland-Pfalz. [https://geodaten.naturschutz.rlp.de/kartendienste\\_naturschutz/](https://geodaten.naturschutz.rlp.de/kartendienste_naturschutz/) (2022).
- MU & LUG/ Ministerium für Umwelt Rheinland-Pfalz und Landesamt für Umweltschutz und Gewerbeaufsicht Rheinland-Pfalz. Planung Vernetzter Biotopsysteme. Bereich Landkreis Cochem-Zell. Mainz, Oppenheim. <https://map-final.rlp-umwelt.de/Kartendienste/index.php?service=vbs> (1993)
- Reinhardt, R., & Bolz, R. Rote Liste und Gesamtartenliste der Tagfalter (Rhopalocera) (Lepidoptera: Papilionidae et Hesperioidea) Deutschlands. In *Bundesamt für Naturschutz (Ed.). Rote Liste gefährdeter Tiere, Pflanzen und Pilze Deutschlands: Band 3: Wirbellose Tiere (Teil 1). Naturschutz und Biologische Vielfalt* **70** (3), 167–194(Bundesamt für Naturschutz, 2011).
- Schmid-Egger, C., Risch, S., & Niehuis, O. Die Wildbienen und Wespen in Rheinland-Pfalz (Hymenoptera, Aculeata). Verbreitung, Ökologie und Gefährdungssituation. *Fauna und Flora Rheinland-Pfalz* **16** (1995).
- Schmidt, A. Rote Liste der Großschmetterlinge in Rheinland- Pfalz. (Ministerium für Umwelt, Landwirtschaft, Ernährung, Weinbau und Forsten Rheinland-Pfalz,2013)
- Westrich, P. *et al.*). Rote Liste und Gesamtartenliste der Bienen (Hymenoptera, Apidae) Deutschlands. In *Bundesamt für Naturschutz (Ed.). Rote Liste gefährdeter Tiere, Pflanzen und Pilze Deutschlands: Band 3: Wirbellose Tiere (Teil 1). Naturschutz und Biologische Vielfalt* **70**, 373–416(Bundesamt für Naturschutz,2011).
